# Supplementary material for: A combined high-throughput and high-content platform for unified on-chip synthesis, characterization and biological screening
Source: PubMed Central journal article supplement (PMC7589500; doi:10.1038/s41467-020-19040-0), 2020-10-26
Supplement: 41467_2020_19040_MOESM1_ESM.pdf [file 41467_2020_19040_MOESM1_ESM.pdf]

Supplementary Information for

**A combined high-throughput and high-content platform for unified on-chip synthesis, characterization and biological screening**

Benz et al.

## Supplementary Figures

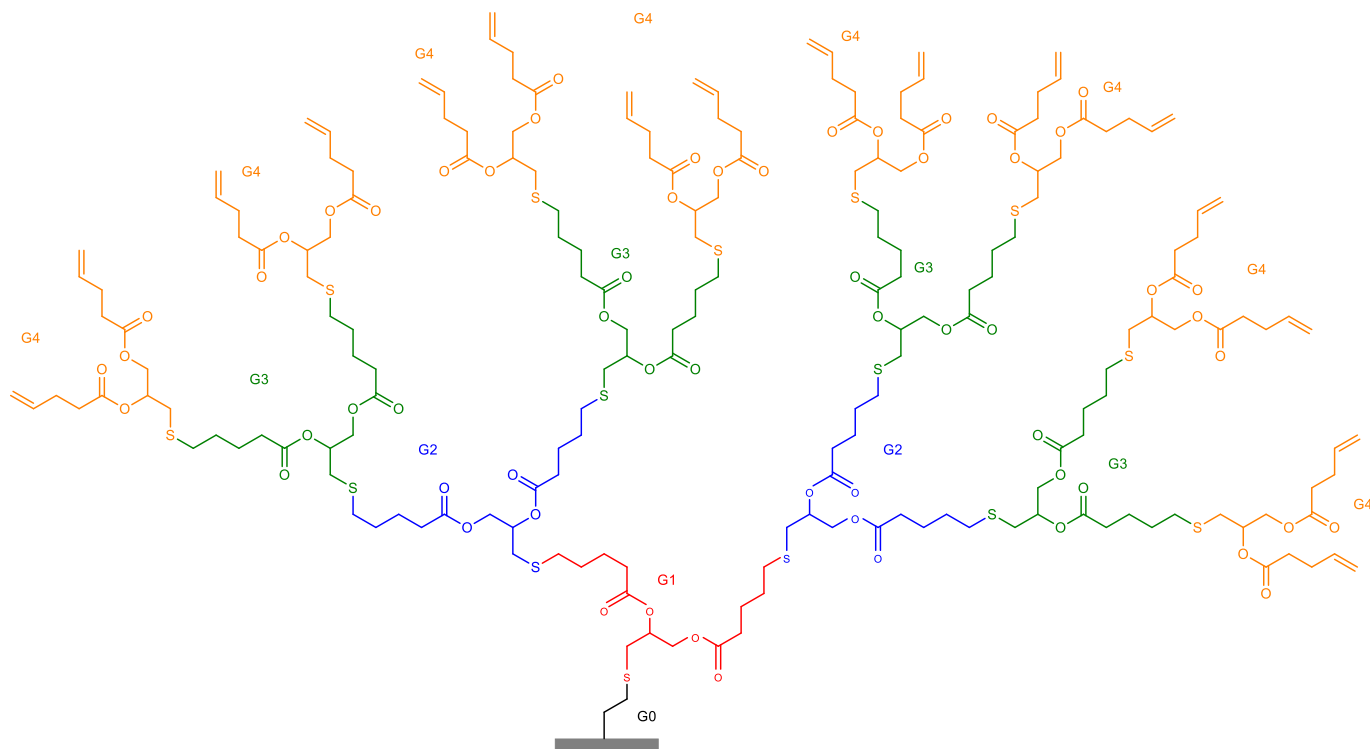

Supplementary Figure 1 | Chemical structure of a surface-grafted G4 dendrimer.

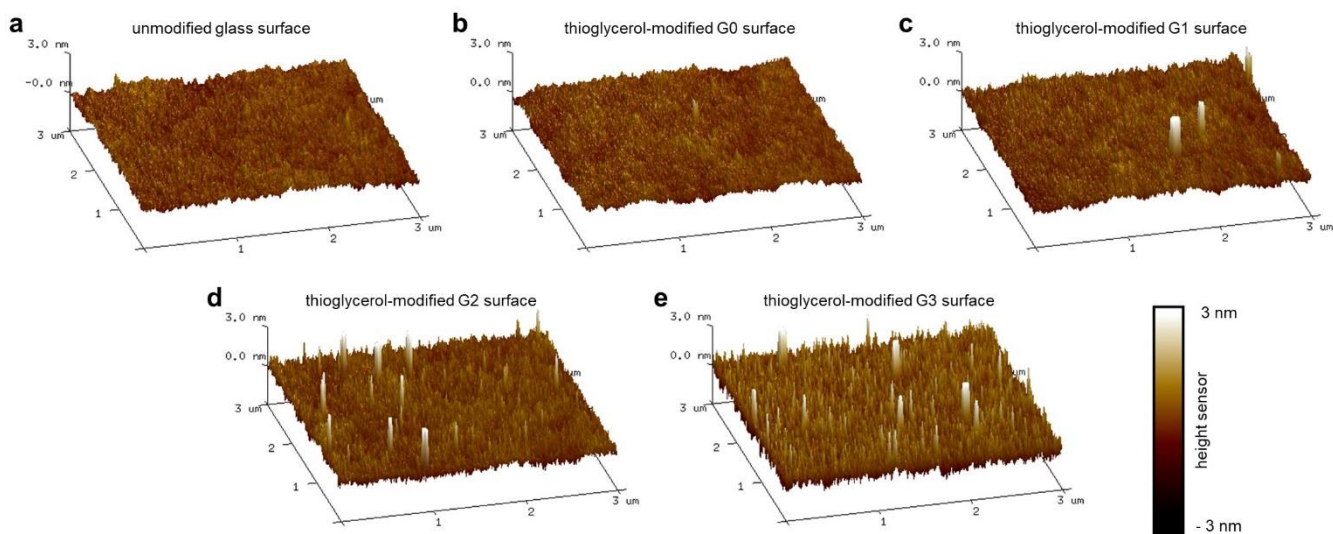

Supplementary Figure 2 | Atomic force microscopy (AFM) surface characterization. AFM image of an (a) unmodified, (b) thioglycerol-modified G0, (c) G1, (d) G2, and (e) G3 surface measured in non-contact tapping mode in air. Field-of-view: 3 x 3 μm<sup>2</sup>.

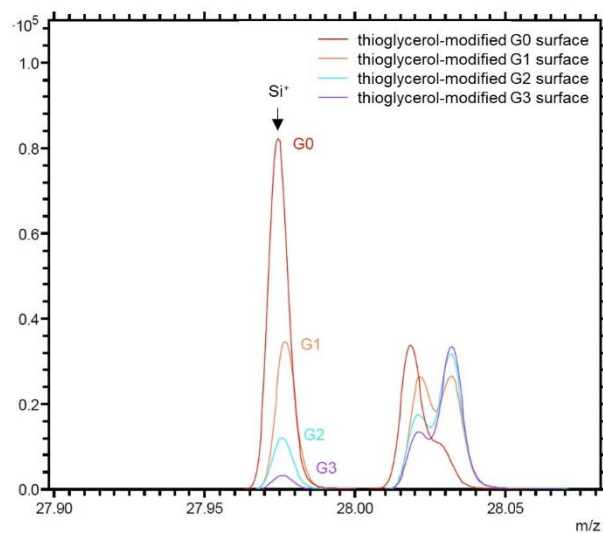

**Supplementary Figure 3 | Time-of-flight secondary ion mass spectrometry (ToF-SIMS) surface characterization.** ToF-SIMS results comparing the Si<sup>+</sup> signal intensity in positive polarity mode of thioglycerol-modified G0-3 surfaces. Source data are provided as a Source Data file.

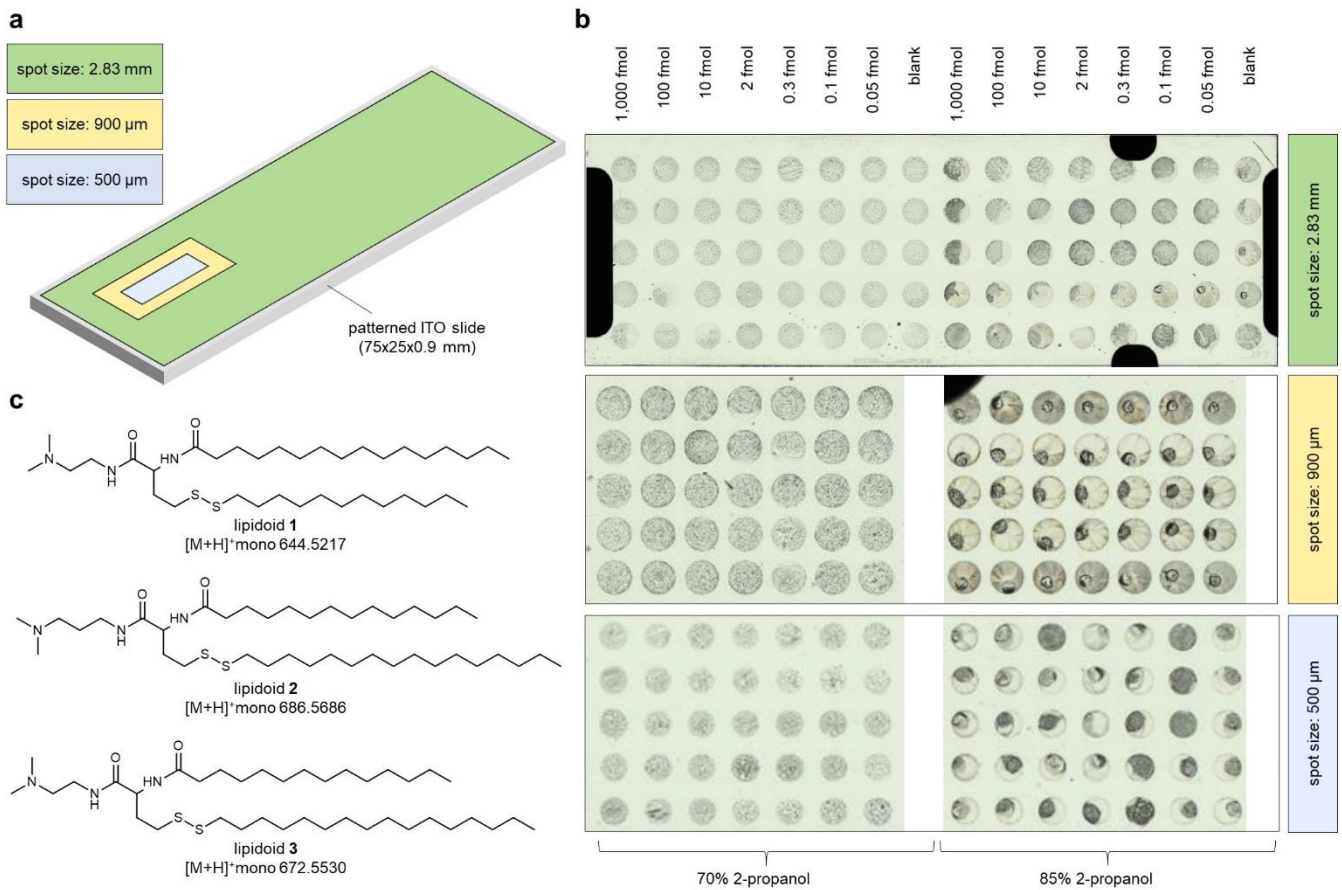

**Supplementary Figure 4 | On-chip matrix-assisted laser desorption / ionization mass spectrometry (MALDI-TOF MS).**

(a) Schematically comparing the required surface area on a omniphilic-omniphobic patterned ITO slide for applying lipidoid **1** in seven different concentrations, each in five replications, and 2x five blank spots (CHCA matrix without sample) on 2.83 mm (spot width: 1.67 mm), 900 μm (spot width: 225 μm) and 500 μm (spot width: 250 μm) round spots. (b) Microscopy images of omniphilic-omniphobic patterned ITO slides with different spot sizes (2.83 mm, 900 μm and 500 μm round spots) containing dried lipidoid **1** in different amounts of substance per spot (1,000, 100, 10, 2, 0.3, 0.1 and 0.05 fmol). Matrix solution was applied using 70 and 85% 2-propanol. (c) Chemical structure of lipidoid **1**, **2** and **3**.

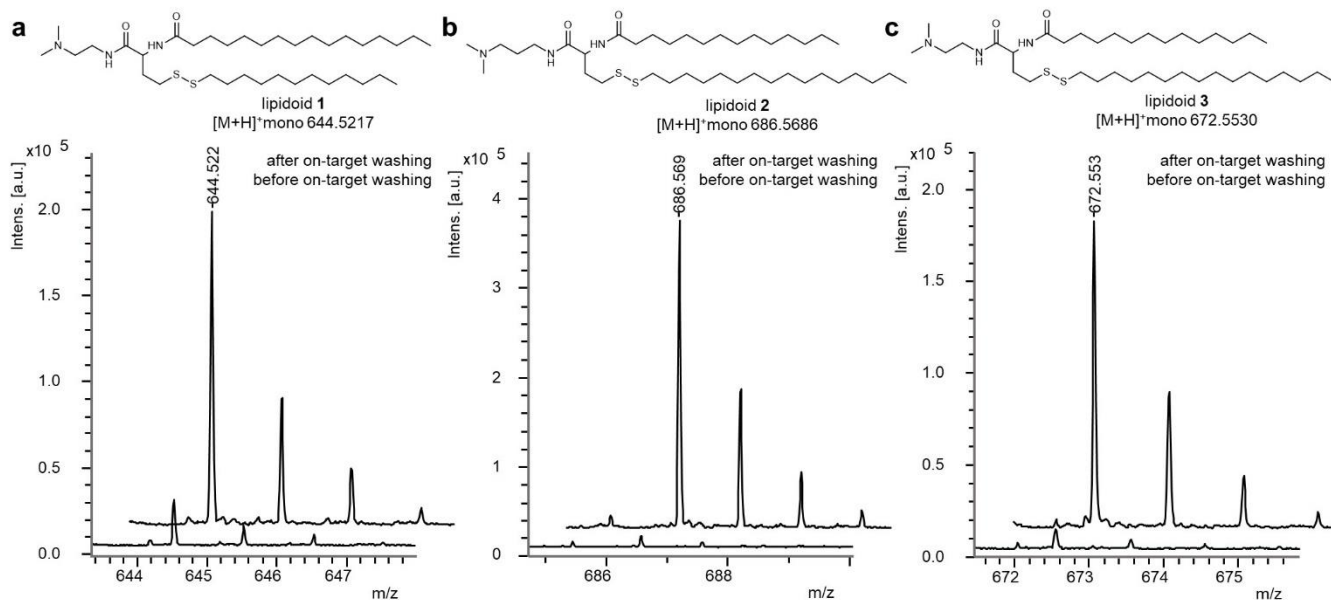

**Supplementary Figure 5 | Effect of on-target washing on MALDI-TOF MS sensitivity.** MS spectra of (a) lipidoid 1 ([M+H]<sup>+</sup>mono: 644.5217), (b) lipidoid 2 ([M+H]<sup>+</sup>mono: 686.5686) and (c) lipidoid 3 ([M+H]<sup>+</sup>mono: 672.5530) before and after on-target washing. Source data are provided as a Source Data file.

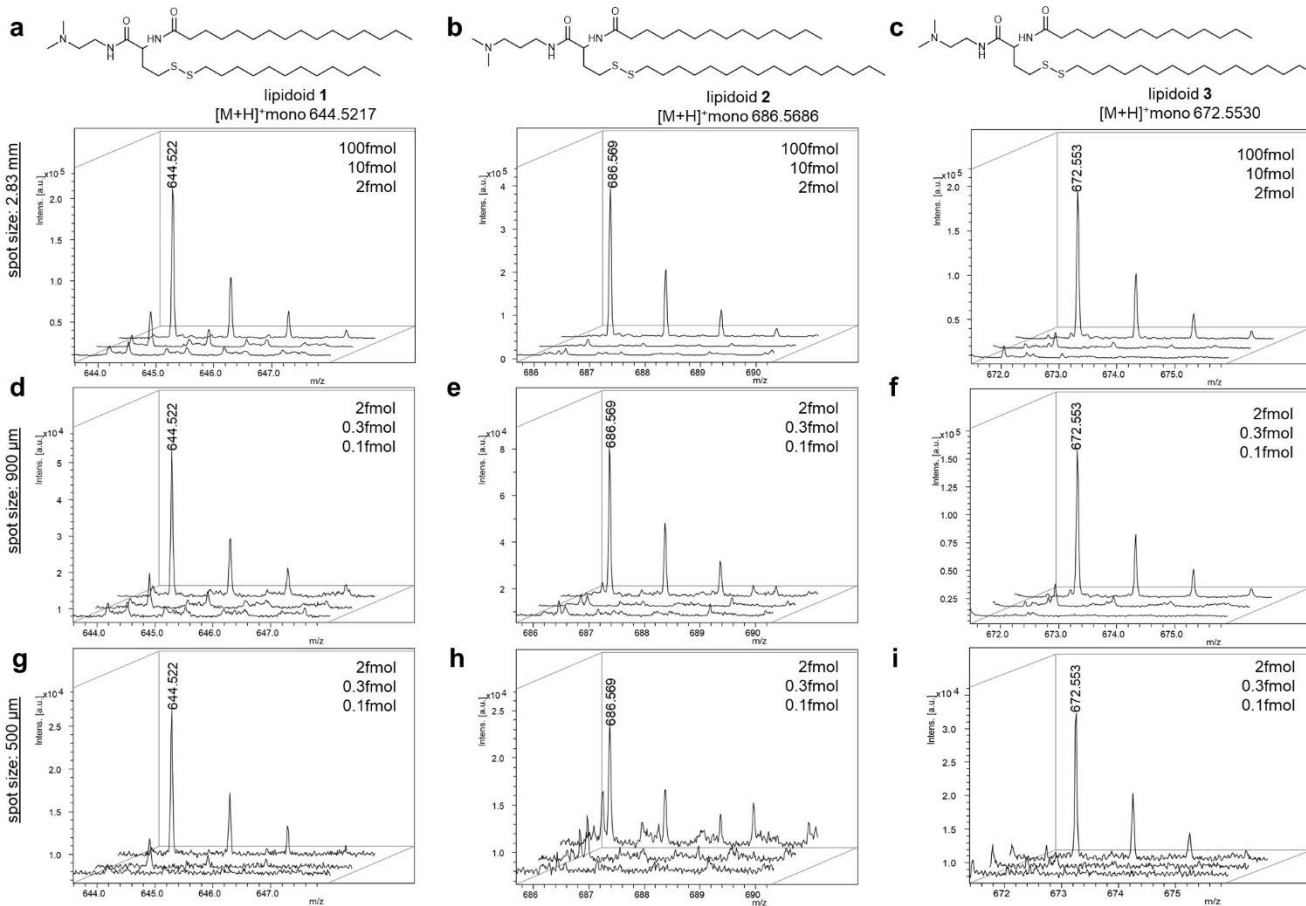

**Supplementary Figure 6 | Sensitivity limitation of on-chip MALDI-TOF MS.** MS spectra of lipidoid 1, 2 and 3 of (a-c) 100, 10 and 2 fmol per 2.83 mm spot, (d-f) 2, 0.3 and 0.1 fmol per 900  $\mu\text{m}$  spot, and (g-i) 2, 0.3 and 0.1 fmol per 500  $\mu\text{m}$  spot. Source data are provided as a Source Data file.

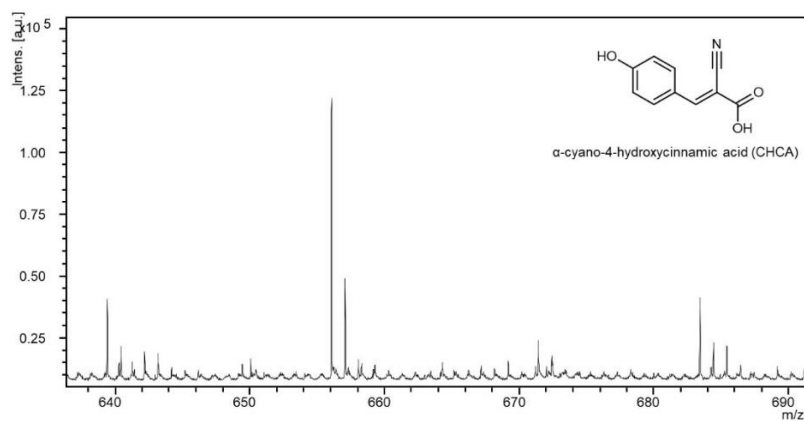

**Supplementary Figure 7 | MALDI-TOF MS spectrum of  $\alpha$ -cyano-4-hydroxycinnamic acid (CHCA) measured on-chip.** Source data are provided as a Source Data file.

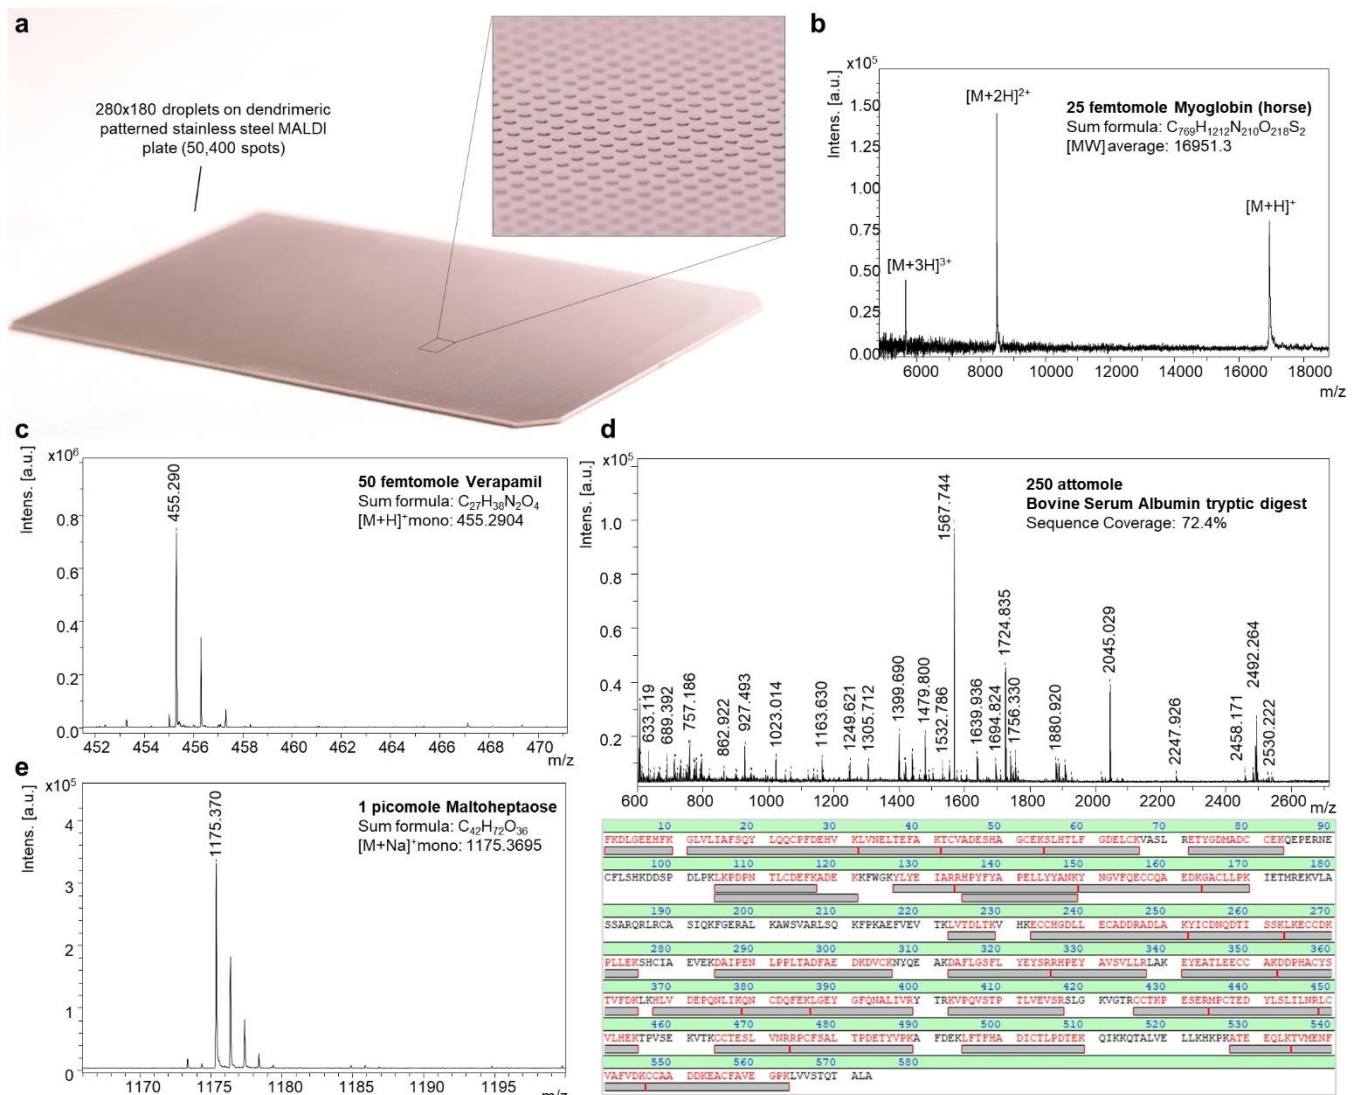

**Supplementary Figure 8 | MALDI-TOF MS on an omniphilic-omniphobic patterned stainless steel plate.** (a) Photograph of a dendrimer-modified and patterned stainless steel plate of microtiter plate size presenting 50,400 individual droplets. Spot size:  $330 \times 330 \mu\text{m}^2$ ; spot distance:  $60 \mu\text{m}$ ; solvent: DMSO. Mass spectra measured on patterned stainless steel plate of (b) 25 femtomole myoglobin, (c) 50 femtomole Verapamil, (d) 250 attomole tryptic digested bovine albumin and (e) 1 picomole maltoheptaose.

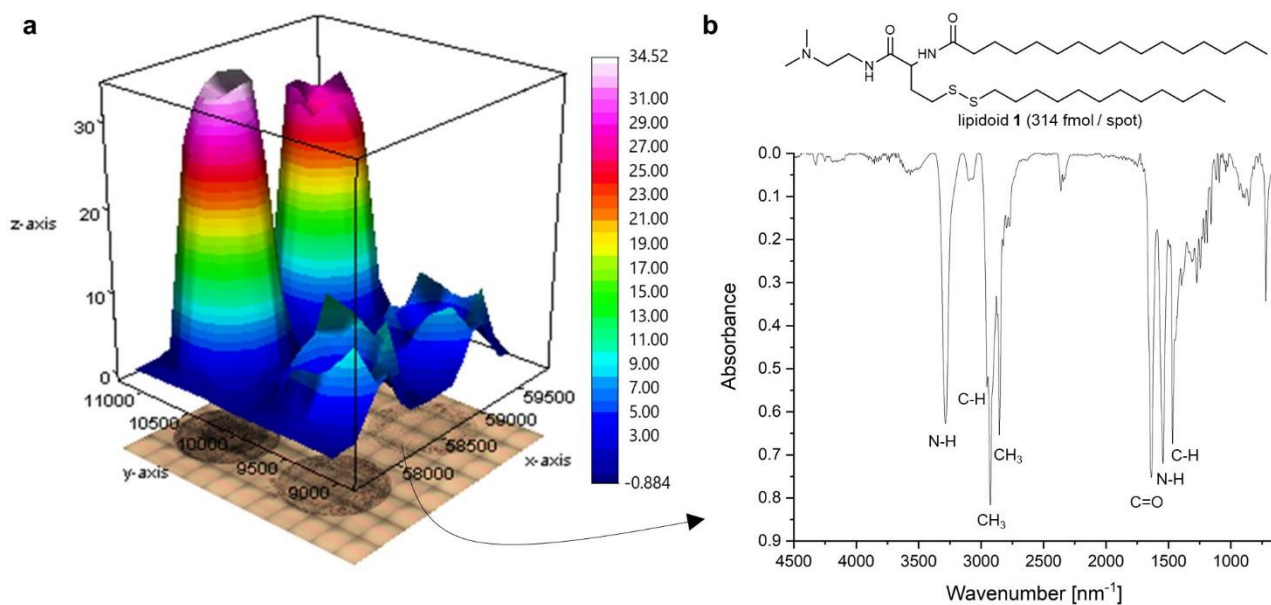

**Supplementary Figure 9 | On-chip characterization by IR spectroscopy. (a)** IR imaging of lipidoid **1** applied in different concentrations on an omniphilic-omniphobic patterned ITO surface. Color scale: Absorbance [a.u.]. **(b)** Corresponding on-chip measured IR spectrum of 314 fmol of lipidoid **1**. Source data are provided as a Source Data file.



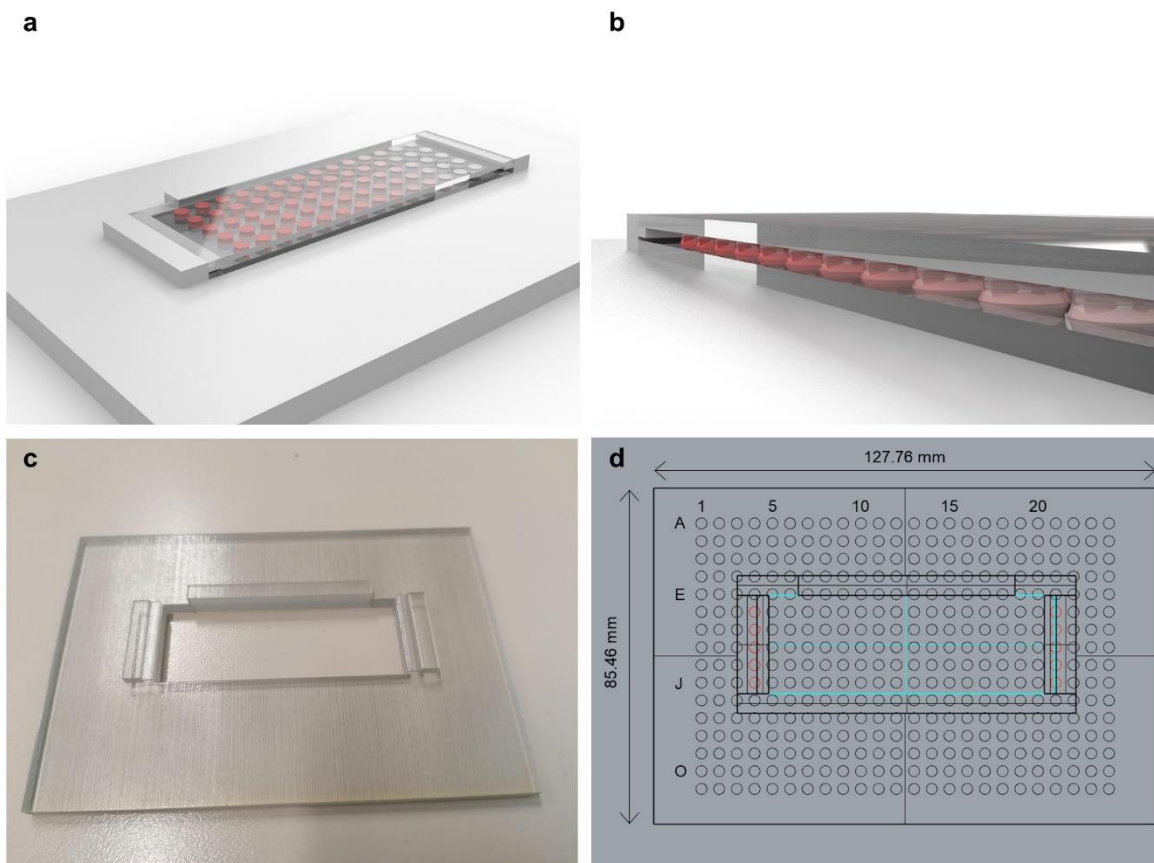

**Supplementary Figure 10 | 3D-printed sandwiching adapter for UV-Vis measurements.** (a-b) Concept art images of a droplet array trapped between two dendrimer-modified, omniphilic-omniphobic patterned slides. The slides were sandwiched using a 3D-printed adapter. (c) Photography of the 3D-printed sandwiching adapter. (d) Schematically showing the top view of the sandwiching adapter with overlaid 384-well microtiter plate patterns. Blue: omniphilic-omniphobic patterned glass slide.

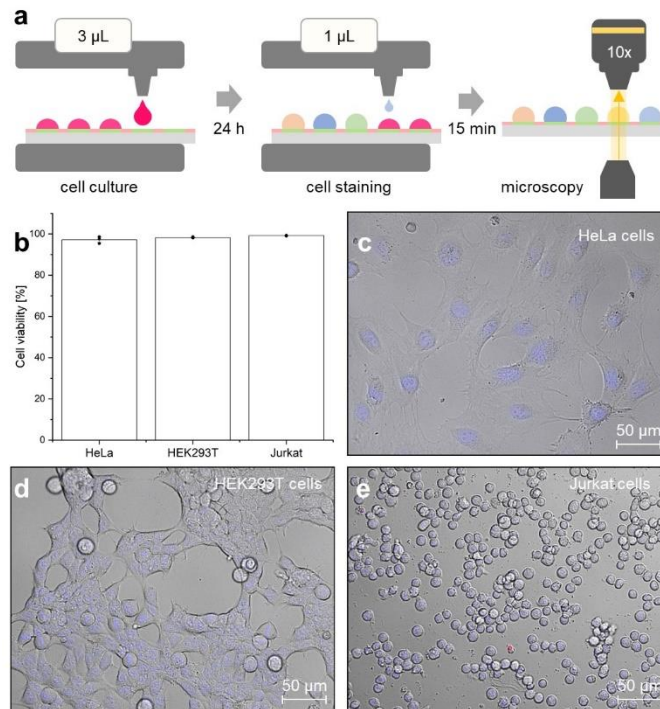

**Supplementary Figure 11 | On-chip cell culture using dendrimer slides.** (a) Schematic diagram showing the process of cell culture and viability tests. Cell suspensions were dispensed to each spot of a dendrimer-based chemBIOS slide and cultured at 37°C under 5% CO<sub>2</sub> for 24 h. Cell staining solution (Hoechst 33342 and propidium iodide) was dispensed to individual droplets and cell viability was evaluated by fluorescence microscopy. (b) Cell viability of on-chip cultured HeLa, HEK293T and Jurkat cells. (c) Microscopy images of stained (Hoechst 33342 and propidium iodide) HeLa, (d) HEK293T, and (e) Jurkat cells. Scale bar: 50  $\mu$ m. Data represent mean  $\pm$  standard deviation; each result based on triplicate control; n=3 independent experiments. Source data are provided as a Source Data file.

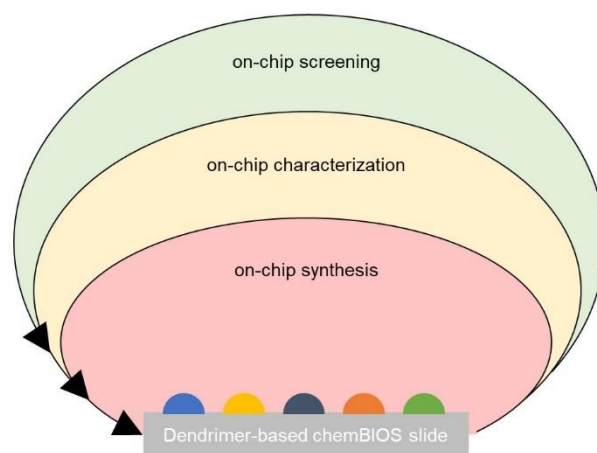

**Supplementary Figure 12 | chemBIOS workflow.** Schematic describing the chemBIOS workflow using a dendrimer-modified, omniphilic-omniphobic patterned slide that enables the handling of both low-surface tension liquids (organic solvents) and high-surface tension liquids (aqueous solutions / cell suspension) on the same substrate. On-chip synthesis, on-chip characterization and on-chip screening can be performed using one slide without the need of additional transfer steps.

## Supplementary Tables

**Supplementary Table 1 | Results of contact angle measurements.** N/A: not tested. Each result based on triplicate control; n=3 independent experiments. Source data are provided as a Source Data file.

|                                         | solvent          | $\theta_{adv}$ [°] | $\sigma_{adv}$ [°] | $\theta_{stat}$ [°] | $\sigma_{stat}$ [°] | $\theta_{rec}$ [°] | $\sigma_{rec}$ [°] |
|-----------------------------------------|------------------|--------------------|--------------------|---------------------|---------------------|--------------------|--------------------|
| PFDT-modified G3<br>surface             | H <sub>2</sub> O | 125                | 3                  | 116                 | 4                   | 111                | 3                  |
|                                         | DMSO             | 100                | 2                  | 97                  | 1                   | 66                 | 2                  |
|                                         | DMF              | 103                | 1                  | 91                  | 4                   | 67                 | 3                  |
|                                         | toluene          | 89                 | 1                  | 80                  | 2                   | 63                 | 2                  |
|                                         | n-hexadecane     | 86                 | 1                  | 81                  | 2                   | 74                 | 1                  |
|                                         | ethanol          | 80                 | 1                  | 72                  | 2                   | 40                 | 0                  |
| Thioglycerol-<br>modified G3<br>surface | H <sub>2</sub> O | 33                 | 2                  | N/A                 | N/A                 | 1                  | 1                  |
|                                         | DMSO             | 12                 | 2                  | N/A                 | N/A                 | <1                 | <1                 |
|                                         | DMF              | 4                  | 1                  | N/A                 | N/A                 | <1                 | <1                 |
|                                         | ethanol          | 3                  | 1                  | N/A                 | N/A                 | <1                 | <1                 |

**Supplementary Table 2 | Results of surface roughness (Rq) measurements by AFM.** Each result based on triplicate control; n=3 independent experiments. Source data are provided as a Source Data file.

| $\theta(Rq(unmod.))$ [pm] | $\theta(Rq(G0))$ [pm]       | $\theta(Rq(G1))$ [pm]   | $\theta(Rq(G2))$ [pm]   | $\theta(Rq(G3))$ [pm]   |
|---------------------------|-----------------------------|-------------------------|-------------------------|-------------------------|
| 212±8                     | 238±23                      | 335±44                  | 424±61                  | 508±26                  |
|                           | $\Delta Rq(G0-unmod.)$ [pm] | $\Delta Rq(G1-G0)$ [pm] | $\Delta Rq(G2-G1)$ [pm] | $\Delta Rq(G3-G2)$ [pm] |
|                           | 26                          | 97                      | 90                      | 83                      |

**Supplementary Table 3 | Results of dendrimer layer thickness (d) measurements by AFM.** Each result based on triplicate control; n=3 independent experiments. Source data are provided as a Source Data file.

| $\theta d(G0)$ [nm] | $\theta d(G1)$ [nm] | $\theta d(G2)$ [nm] | $\theta d(G3)$ [nm] |
|---------------------|---------------------|---------------------|---------------------|
| 1.27±0.22           | 2.03±0.05           | 2.99±0.19           | 4.19±0.49           |
|                     | $\Delta d(G1-G0)$   | $\Delta d(G2-G1)$   | $\Delta d(G3-G2)$   |
|                     | 0.76                | 0.95                | 1.21                |

**Supplementary Table 4 | Dendrimer layer thickness calculation.**

|               | <b>bond length [nm]<sup>1, 2</sup></b> |
|---------------|----------------------------------------|
| C(sp3)-S      | 218                                    |
| S-C(sp3)      | 218                                    |
| C(sp3)-C(sp3) | 154                                    |
| C(sp3)-C(sp3) | 154                                    |
| C(sp3)-O      | 143                                    |
| O-C(sp2)      | 143                                    |
| C(sp2)-C(sp3) | 150                                    |
| C(sp3)-C(sp3) | 154                                    |
| C(sp3)-C(sp2) | 150                                    |
| C(sp2)-C(sp2) | 134                                    |
| Sum           | 1,618                                  |

**Supplementary Table 5 | Mean MALDI-TOF MS Signal-to-Noise (S/N) ratios of lipidoid (L) 1, 2 and 3 measured on 2.83 mm spots before and after on-target washing.** Each result based on triplicate control; n=3 independent experiments. Source data are provided as a Source Data file.

| <b>Amount on spot [fmol]</b> | <b>L1 before</b> | <b>L1 after</b> | <b>L2 before</b> | <b>L2 after</b> | <b>L3 before</b> | <b>L3 after</b> |
|------------------------------|------------------|-----------------|------------------|-----------------|------------------|-----------------|
| 1,000                        | 312±28           | 956±169         | 193±11           | 652±85          | 367±256          | 759±192         |
| 100                          | 52±10            | 116±24          | 35±23            | 178±89          | 27±6             | 150±33          |
| 10                           | 4±1              | 11±1            | 2±0              | 10±2            | 2±0              | 10±1            |
| 2                            | 2±0              | 3±1             |                  | 3±0             |                  | 4±0             |

**Supplementary Table 6 | Mean MALDI-TOF MS S/N ratios of lipidoid (L) 1, 2 and 3 measured on 900  $\mu\text{m}$  and 500  $\mu\text{m}$  spots after on-target washing.** Each result based on triplicate control; n=3 independent experiments. Source data are provided as a Source Data file.

| Amount<br>on spot<br>[fmol] | 900 $\mu\text{m}$ spots |                 |                 | 500 $\mu\text{m}$ spot |                |                |
|-----------------------------|-------------------------|-----------------|-----------------|------------------------|----------------|----------------|
|                             | L1                      | L2              | L3              | L1                     | L2             | L3             |
| 1,000                       | 2,601 $\pm$ 274         | 2,452 $\pm$ 150 | 2,804 $\pm$ 362 | 2,666 $\pm$ 141        | 2,071 $\pm$ 66 | 2,591 $\pm$ 64 |
| 100                         | 1,178 $\pm$ 108         | 859 $\pm$ 238   | 767 $\pm$ 221   | 696 $\pm$ 120          | 730 $\pm$ 260  | 818 $\pm$ 75   |
| 10                          | 137 $\pm$ 25            | 65 $\pm$ 15     | 148 $\pm$ 112   | 155 $\pm$ 76           | 338 $\pm$ 264  | 313 $\pm$ 12   |
| 2                           | 47 $\pm$ 21             | 34 $\pm$ 6      | 62 $\pm$ 22     | 35 $\pm$ 7             | 13 $\pm$ 1     | 29 $\pm$ 20    |
| 0.3                         | 9 $\pm$ 5               | 4 $\pm$ 1       | 6 $\pm$ 1       | 10 $\pm$ 1             | 8 $\pm$ 3      | 4 $\pm$ 2      |
| 0.1                         | 4 $\pm$ 1               | 3 $\pm$ 0       | 3 $\pm$ 0       | 2 $\pm$ 0              | 2 $\pm$ 0      | 3 $\pm$ 2      |
| 0.05                        | 3 $\pm$ 0               | 3 $\pm$ 0       |                 | 3 $\pm$ 1              | 1 $\pm$ 0      | 1 $\pm$ 0      |

## References

1. Fox, M.A. & Whitesell, J.K. *Organische Chemie: Grundlagen, Mechanismen, Bioorganische Anwendungen*. (Spektrum Akad. Verlag, 1995).
2. Lide, D.R. *CRC Handbook of Chemistry and Physics: A Ready-Reference Book of Chemical and Physical Data*. (CRC-Press, 1984).
