# Supplementary material for: A combined high-throughput and high-content platform for unified on-chip synthesis, characterization and biological screening
Source: PubMed Central journal article supplement (PMC7589500; doi:10.1038/s41467-020-19040-0), 2020-10-26
Supplement: 41467_2020_19040_MOESM3_ESM.pdf [file 41467_2020_19040_MOESM3_ESM.pdf]

## Reporting Summary

Nature Research wishes to improve the reproducibility of the work that we publish. This form provides structure for consistency and transparency in reporting. For further information on Nature Research policies, see [Authors & Referees](#) and the [Editorial Policy Checklist](#).

### Statistics

For all statistical analyses, confirm that the following items are present in the figure legend, table legend, main text, or Methods section.

- | n/a                                 | Confirmed                                                                                                                                                                                                                                                                                      |
|-------------------------------------|------------------------------------------------------------------------------------------------------------------------------------------------------------------------------------------------------------------------------------------------------------------------------------------------|
| <input type="checkbox"/>            | <input checked="" type="checkbox"/> The exact sample size ( $n$ ) for each experimental group/condition, given as a discrete number and unit of measurement                                                                                                                                    |
| <input type="checkbox"/>            | <input checked="" type="checkbox"/> A statement on whether measurements were taken from distinct samples or whether the same sample was measured repeatedly                                                                                                                                    |
| <input checked="" type="checkbox"/> | <input type="checkbox"/> The statistical test(s) used AND whether they are one- or two-sided<br><i>Only common tests should be described solely by name; describe more complex techniques in the Methods section.</i>                                                                          |
| <input checked="" type="checkbox"/> | <input type="checkbox"/> A description of all covariates tested                                                                                                                                                                                                                                |
| <input checked="" type="checkbox"/> | <input type="checkbox"/> A description of any assumptions or corrections, such as tests of normality and adjustment for multiple comparisons                                                                                                                                                   |
| <input type="checkbox"/>            | <input checked="" type="checkbox"/> A full description of the statistical parameters including central tendency (e.g. means) or other basic estimates (e.g. regression coefficient) AND variation (e.g. standard deviation) or associated estimates of uncertainty (e.g. confidence intervals) |
| <input checked="" type="checkbox"/> | <input type="checkbox"/> For null hypothesis testing, the test statistic (e.g. $F$ , $t$ , $r$ ) with confidence intervals, effect sizes, degrees of freedom and $P$ value noted<br><i>Give <math>P</math> values as exact values whenever suitable.</i>                                       |
| <input checked="" type="checkbox"/> | <input type="checkbox"/> For Bayesian analysis, information on the choice of priors and Markov chain Monte Carlo settings                                                                                                                                                                      |
| <input type="checkbox"/>            | <input checked="" type="checkbox"/> For hierarchical and complex designs, identification of the appropriate level for tests and full reporting of outcomes                                                                                                                                     |
| <input checked="" type="checkbox"/> | <input type="checkbox"/> Estimates of effect sizes (e.g. Cohen's $d$ , Pearson's $r$ ), indicating how they were calculated                                                                                                                                                                    |

*Our web collection on [statistics for biologists](#) contains articles on many of the points above.*

### Software and code

Policy information about [availability of computer code](#)

#### Data collection

Water Contact Angle: Krüss Advance 1.6.2.0; Krüss GmbH  
 AFM: MultiMode 8-HR; Bruker Corporation  
 ToF-SIMS: Surfacelab 7.0.106074; IONTOF GmbH  
 MS: flexControl 4.0.35; Bruker Corporation  
 IR: Opus 7.8; Bruker Corporation  
 UV-Vis: UV WinLab 6.0.4; PerkinElmer, Inc. / Gen5; BioTek Instruments, Inc.  
 Microscopy: BZ-II Viewer 1.5.0.0; Keyence Corporation

#### Data analysis

Water Contact Angle: Krüss Advance 1.6.2.0; Krüss GmbH  
 AFM: NanoScope Analysis 1.50 (build R3.119069); Bruker Corporation  
 ToF-SIMS: Surfacelab 7.0.106074; IONTOF GmbH  
 MS: flexAnalysis 4.0.14; Bruker Corporation  
 IR: Opus 7.8; Bruker Corporation  
 UV-Vis: Office 264 ProPlus Version 1908 Build 11929.20648; Microsoft / OriginPro 2019b Build 9.6.5.169; OriginLab Corporation  
 Microscopy: BZ-II Analyzer 2.1; Keyence Corporation / ImageJ 1.51s; Wayne Rasband National Institutes of Health / Office 264 ProPlus Version 1908 Build 11929.20648; Microsoft / OriginPro 2019b Build 9.6.5.169; OriginLab Corporation

For manuscripts utilizing custom algorithms or software that are central to the research but not yet described in published literature, software must be made available to editors/reviewers. We strongly encourage code deposition in a community repository (e.g. GitHub). See the Nature Research [guidelines for submitting code & software](#) for further information.

## Data

Policy information about [availability of data](#)

All manuscripts must include a [data availability statement](#). This statement should provide the following information, where applicable:

- Accession codes, unique identifiers, or web links for publicly available datasets
- A list of figures that have associated raw data
- A description of any restrictions on data availability

The data that support the findings of this study are available from the corresponding author upon reasonable request. The source data underlying Figs. 3a,b,e,g,i, 4b,c,f, 5b, and 6d and Supplementary Figs. 3, 5a–c, 6a–i, 7, 9b, and 11b and Supplementary Tables 1–4, 5 and 6 are provided as a Source Data file.

## Field-specific reporting

Please select the one below that is the best fit for your research. If you are not sure, read the appropriate sections before making your selection.

Life sciences  Behavioural & social sciences  Ecological, evolutionary & environmental sciences

For a reference copy of the document with all sections, see [nature.com/documents/nr-reporting-summary-flat.pdf](https://www.nature.com/documents/nr-reporting-summary-flat.pdf)

## Life sciences study design

All studies must disclose on these points even when the disclosure is negative.

|                 |                                                                                                                                                                                                                                                                                                                                                                                                          |
|-----------------|----------------------------------------------------------------------------------------------------------------------------------------------------------------------------------------------------------------------------------------------------------------------------------------------------------------------------------------------------------------------------------------------------------|
| Sample size     | No sample size calculation was applied in this study to predetermine sample sizes for experiments using cell lines. A sample size of three was used as a starting point to evaluate the spread of the data (Casadevall A, Fang FC; Reproducible Science, Infect Immun, 2010 Dec; 78 (12):4972-4975). Experiments were repeated more often if necessary to provide results with statistical significance. |
| Data exclusions | No data was excluded from the analysis.                                                                                                                                                                                                                                                                                                                                                                  |
| Replication     | All attempts at replication were successful. The repeating numbers for each experiment are stated in the method part where it is applicable.                                                                                                                                                                                                                                                             |
| Randomization   | No randomization was required as cell cultures were treated and grown identically apart from the experimental perturbation.                                                                                                                                                                                                                                                                              |
| Blinding        | No blinding was required as cell cultures were treated and grown identically apart from the experimental perturbation.                                                                                                                                                                                                                                                                                   |

## Reporting for specific materials, systems and methods

We require information from authors about some types of materials, experimental systems and methods used in many studies. Here, indicate whether each material, system or method listed is relevant to your study. If you are not sure if a list item applies to your research, read the appropriate section before selecting a response.

### Materials & experimental systems

| n/a                                 | Involved in the study                                     |
|-------------------------------------|-----------------------------------------------------------|
| <input checked="" type="checkbox"/> | <input type="checkbox"/> Antibodies                       |
| <input type="checkbox"/>            | <input checked="" type="checkbox"/> Eukaryotic cell lines |
| <input checked="" type="checkbox"/> | <input type="checkbox"/> Palaeontology                    |
| <input checked="" type="checkbox"/> | <input type="checkbox"/> Animals and other organisms      |
| <input checked="" type="checkbox"/> | <input type="checkbox"/> Human research participants      |
| <input checked="" type="checkbox"/> | <input type="checkbox"/> Clinical data                    |

### Methods

| n/a                                 | Involved in the study                           |
|-------------------------------------|-------------------------------------------------|
| <input checked="" type="checkbox"/> | <input type="checkbox"/> ChIP-seq               |
| <input checked="" type="checkbox"/> | <input type="checkbox"/> Flow cytometry         |
| <input checked="" type="checkbox"/> | <input type="checkbox"/> MRI-based neuroimaging |

## Eukaryotic cell lines

Policy information about [cell lines](#)

|                                                                   |                                                                        |
|-------------------------------------------------------------------|------------------------------------------------------------------------|
| Cell line source(s)                                               | HeLa (ATCC® CCL-2™); HEK293T (ATCC® CRL3216™); Jurkat (ATCC® TIB-152™) |
| Authentication                                                    | None of the cell lines used were authenticated.                        |
| Mycoplasma contamination                                          | All cell lines tested negative for mycoplasma contamination.           |
| Commonly misidentified lines (See <a href="#">ICLAC</a> register) | No misidentified cell lines were used.                                 |
